# Supplementary material
Source: PubMed Central journal article supplement (PMC7655596)

# Computational times for Spectacle functionalities

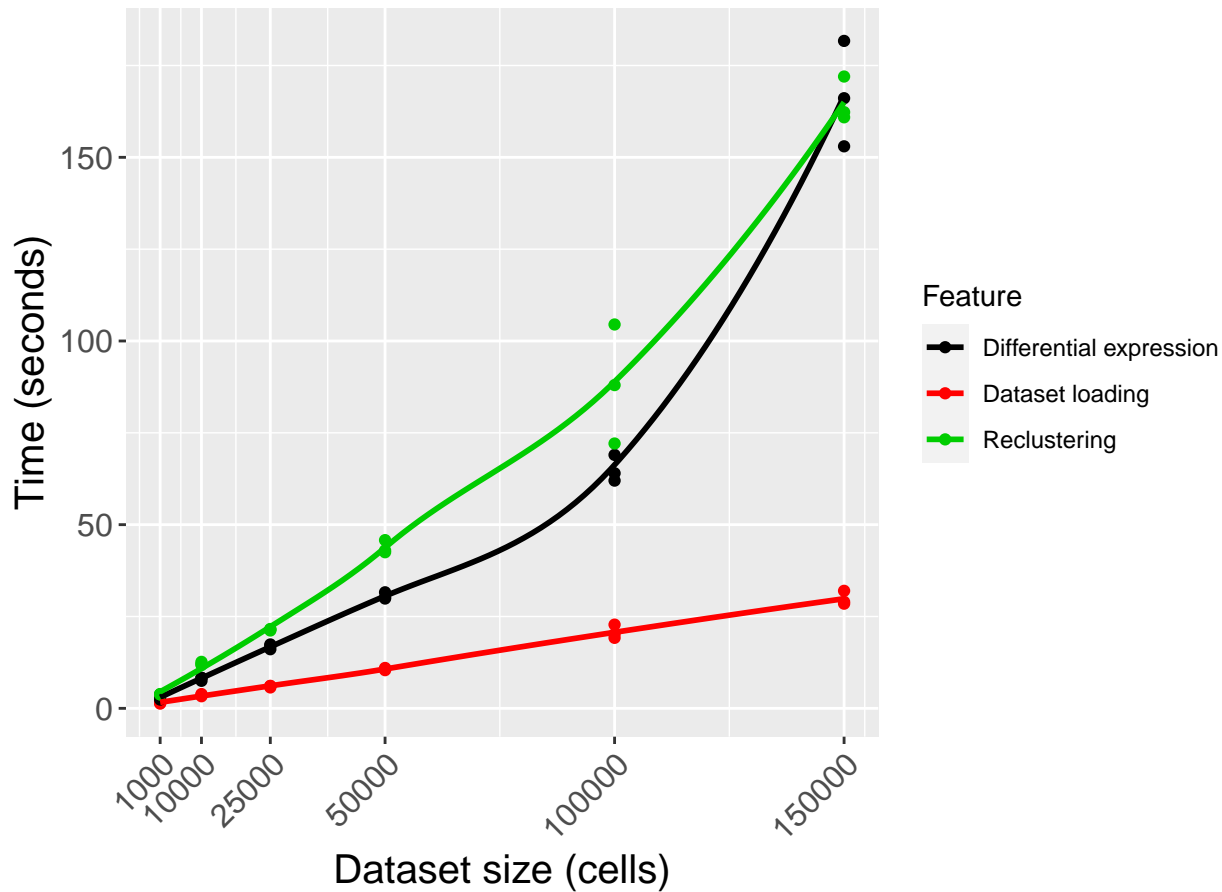

Supplement: NIHMS1629048-supplement-3.pdf [file NIHMS1629048-supplement-3.pdf]
